# Supplementary material for: A novel Cytochrome P450 26A1 expressing NK cell subset at the mouse maternal‐foetal interface
Source: PubMed Central journal article supplement (PMC7875917; doi:10.1111/jcmm.16285), 2021-01-12

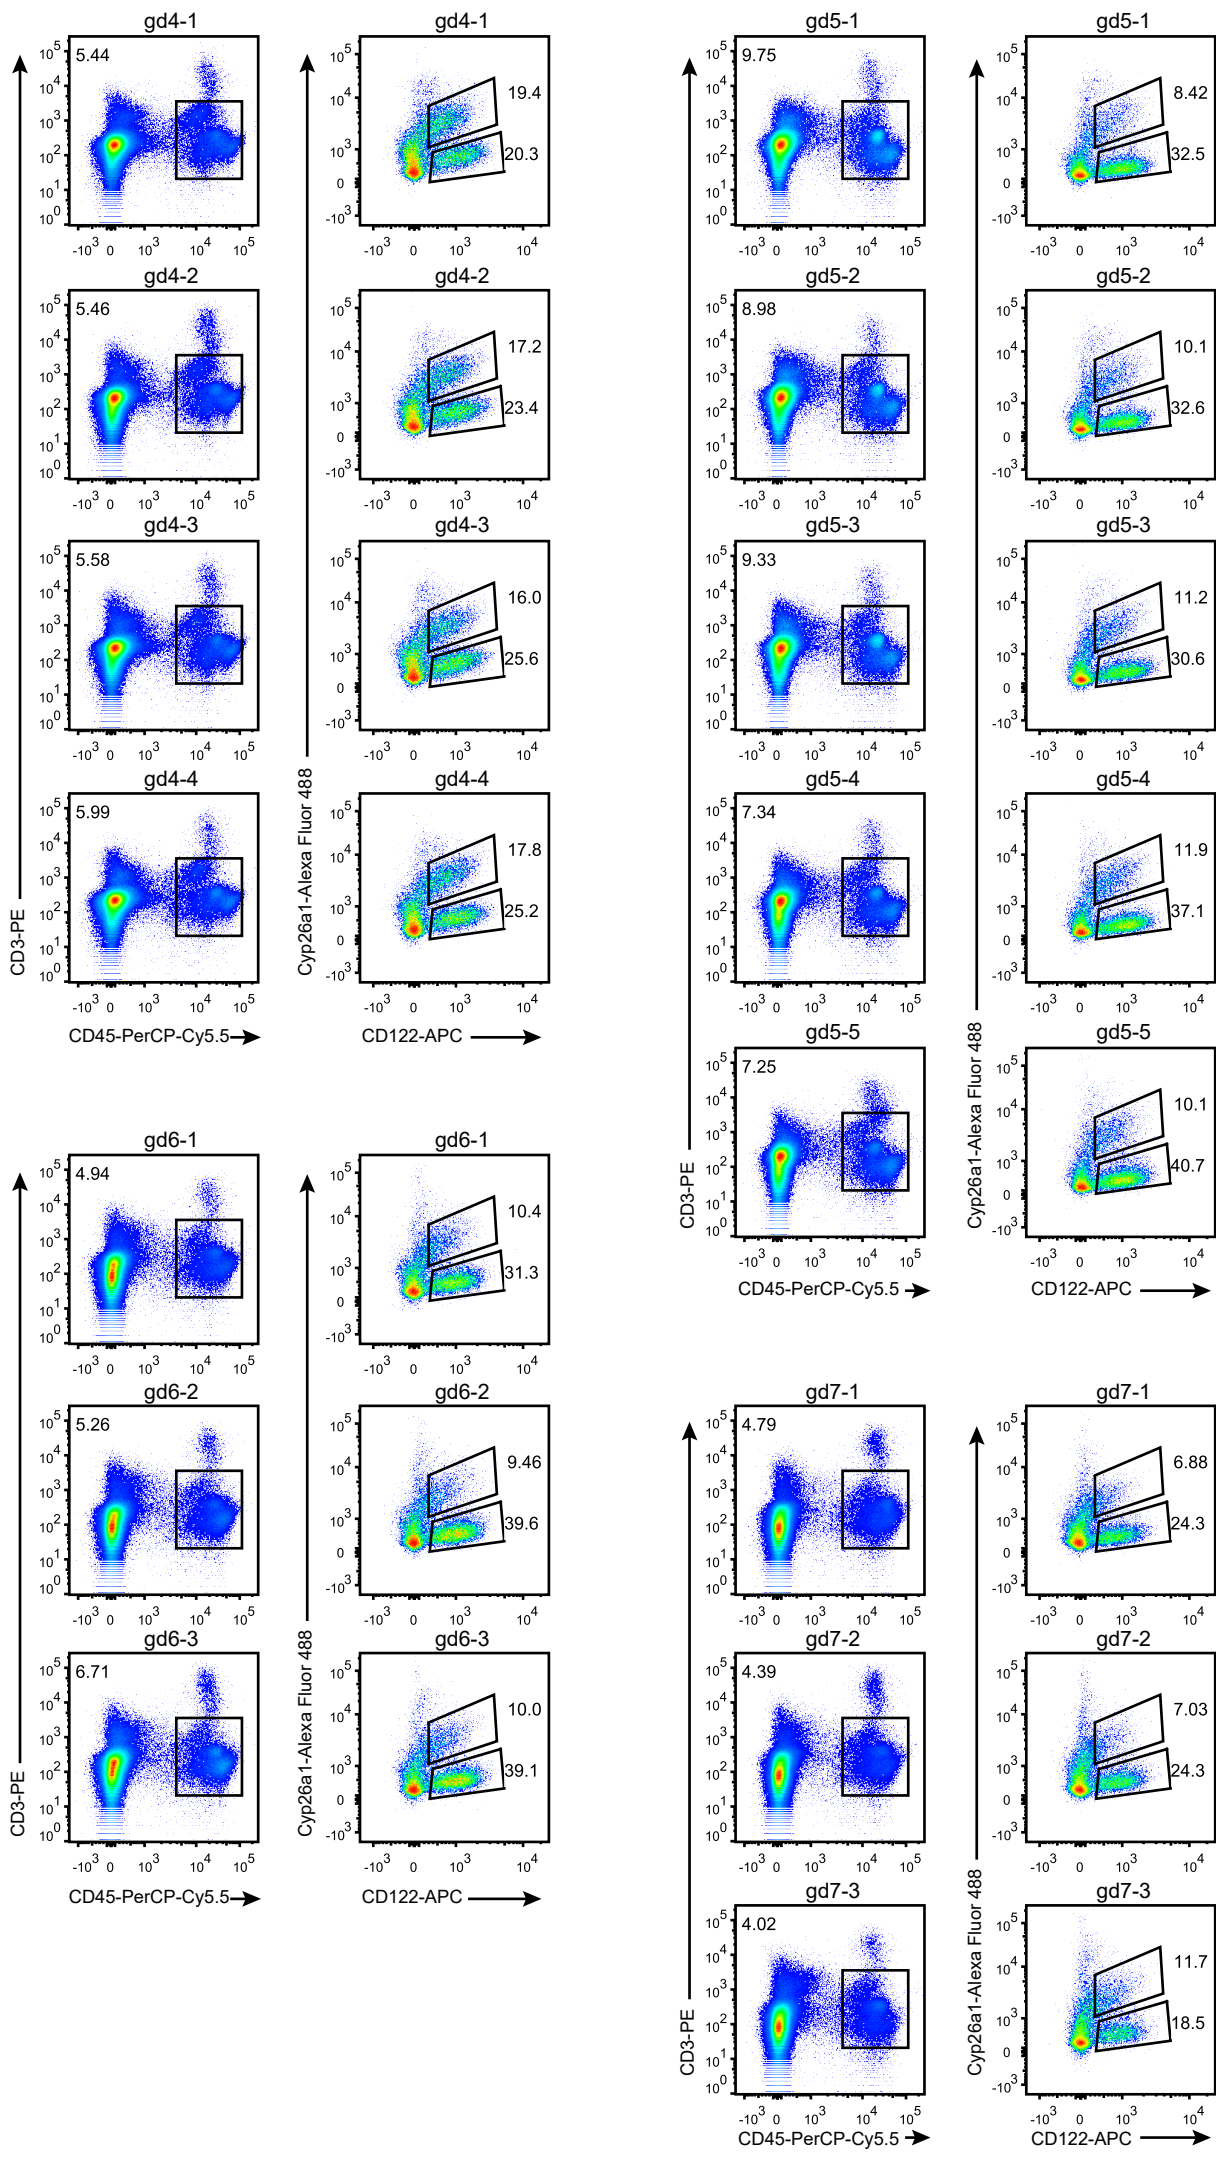

Supplement: JCMM-25-1771-s001.pdf [file JCMM-25-1771-s001.pdf]
